# Supplementary material for: The dramatic acceleration effect of imidazolium ionic liquids on electron transfer reactions
Source: Royal Society of Chemistry journal article supplement (doi:10.1039/b708044a), 2007-01-01
Supplement: b708044a.pdf [file b708044a.pdf]

## Supporting Information

### The Dramatic Acceleration Effect of Imidazolium Ionic Liquids on Electron Transfer Reactions

Doo Seong Choi,<sup>a</sup> Dong Hyun Kim,<sup>a</sup> Ueon Sang Shin,<sup>a</sup> Ravindra R. Deshmukh,<sup>a</sup> Sang-gi Lee,<sup>b</sup> Choong Eui Song<sup>a,\*</sup>

<sup>a</sup>Department of Chemistry, Institute of Basic Science, Sungkyunkwan University, Suwon 440-746 (Korea) Fax: (+82) 31-290-7075; Tel: (+82) 31-290-5964.

E-mail: [s1673@skku.edu](mailto:s1673@skku.edu)

<sup>b</sup>Division of Nano Sciences (BK21)/Department of Chemistry, Ewha Womans University 11-1 Deahyun-dong, Seodaemun-gu, Seoul, 120-750, Korea.

**General Remarks.** (C<sub>5</sub>Me<sub>5</sub>)<sub>2</sub>Fe(II), (C<sub>5</sub>Me<sub>5</sub>)<sub>2</sub>Co(II), Et<sub>4</sub>NCl, thiazole, and 1-bromobutane were purchased from Aldrich and used without further purification. The ILs, [bmim]X (bmim = 1-butyl-3-methylimidazolium cation; X = SbF<sub>6</sub>, PF<sub>6</sub>, NTf<sub>2</sub>, BF<sub>4</sub> and Cl), were purchased from C-Tri Co., Ltd., Korea, ([www.c-tri.co.kr](http://www.c-tri.co.kr)) and used without further purification. [bmim]X (X = SbF<sub>6</sub>, PF<sub>6</sub>, NTf<sub>2</sub>, and BF<sub>4</sub>) were spectrometrically pure, nearly chloride-free (<5 ppm) and their water content was <100 ppm (determined by Karl-Fisher titration). [NBu<sub>4</sub>][SbF<sub>6</sub>] and *N*-butylthiazolium hexafluoroantimonate were prepared by the reaction of [NBu<sub>4</sub>]Cl and *N*-butylthiazolium bromide, respectively, with KSbF<sub>6</sub>.

#### [NBu<sub>4</sub>][SbF<sub>6</sub>]:

<sup>19</sup>F NMR (282 MHz, d<sub>6</sub>-DMSO, CFCl<sub>3</sub> as an external standard): δ -120.1 (sextet,  $J_{(F-Sb(I=5/2))} = 1963$  Hz, octet,  $J_{(F-Sb(I=7/2))} = 1061$  Hz).

#### *N*-butylthiazolium hexafluoroantimonate:

<sup>1</sup>H NMR (300 MHz, d<sub>6</sub>-DMSO, CFCl<sub>3</sub> as an external standard): δ 0.90 (t,  $J = 7.3$  Hz, 3H), 1.26 (m,  $J = 7.3$  Hz, 2H), 1.86 (m,  $J = 7.3$  Hz, 2H), 4.5 (t,  $J = 7.3$  Hz, 2H), 8.33 (d,  $J = 3.7$  Hz, 1H), 8.56 (d,  $J = 3.7$  Hz, 1H), 10.19 (s, 1H); <sup>13</sup>C NMR (75 MHz, d<sub>6</sub>-DMSO): δ 13.0, 18.6, 31.3, 54.1, 126.6, 136.8, 158.9; <sup>19</sup>F NMR (282 MHz, d<sub>6</sub>-DMSO): δ -119.8 ppm (sextet,  $J_{(F-Sb(I=5/2))} = 1954$  Hz, octet,  $J_{(F-Sb(I=7/2))} = 1079$  Hz).

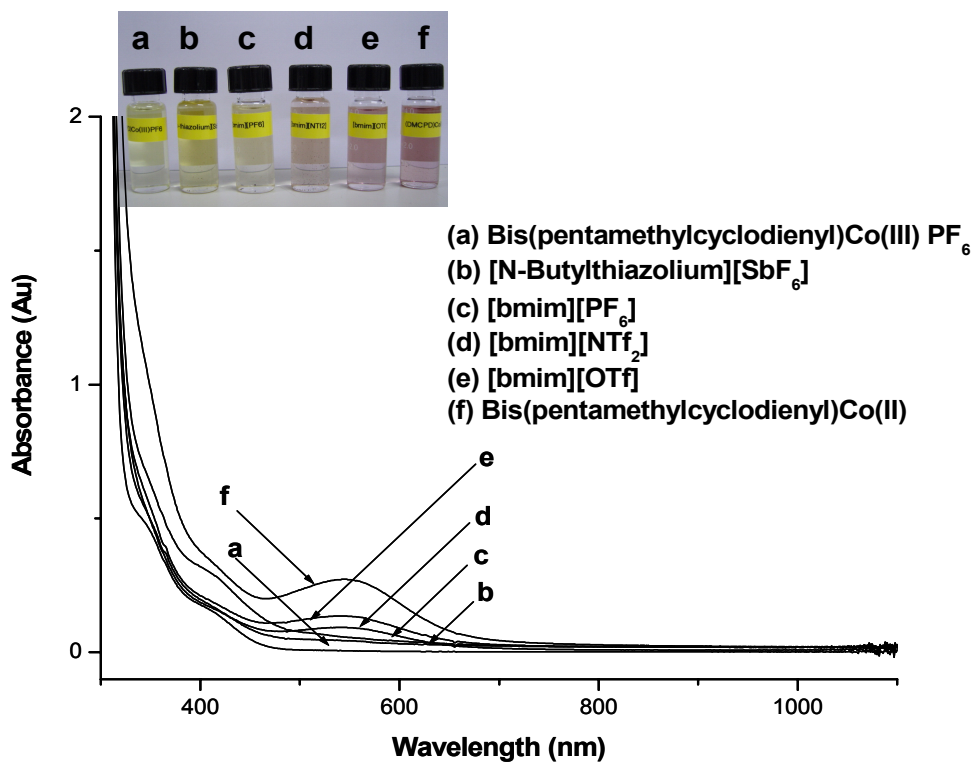

**Figure.** UV-Vis spectra of a mixture of bis(pentamethylcyclopentadienyl)Co(II) (2 mg) with ILs (0.92 mmol) in CH<sub>2</sub>Cl<sub>2</sub> (10 mL) (after 5 min).

## Crystal X-ray crystallography data of 3-SbF<sub>6</sub>

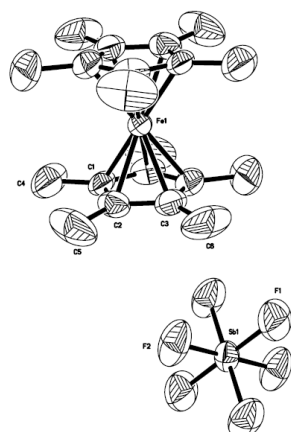

### Single X ray crystal structure of (C<sub>5</sub>Me<sub>5</sub>)<sub>2</sub>Fe(III)-SbF<sub>6</sub> (3-SbF<sub>6</sub>)

**Crystal data.** C<sub>20</sub>H<sub>30</sub>F<sub>6</sub>F<sub>1</sub>Sb<sub>1</sub>, *M* = 562.04, Orthorhombic, *a* = 8.414(2), *b* = 10.307(3), *c* = 13.192(3) Å, *U* = 1144.0(5) Å<sup>3</sup>, *T* = 293(2) K, space group *Pnmm*, *Z* = 2,  $\mu(\text{Mo-K}\alpha)$  = 1.865 mm<sup>-1</sup>, 977 reflections collected, 620 unique (*R*<sub>int</sub> = 0.0000) which were used in all calculations. The final *wR*(*F*<sub>2</sub>) was 0.1197.

**Table 1. Crystal data and structure refinement for Fenew.**

|                                 |                                                                               |          |
|---------------------------------|-------------------------------------------------------------------------------|----------|
| Identification code             | fenew                                                                         |          |
| Empirical formula               | C <sub>20</sub> H <sub>30</sub> F <sub>6</sub> F <sub>1</sub> Sb <sub>1</sub> |          |
| Formula weight                  | 562.04                                                                        |          |
| Temperature                     | 293(2) K                                                                      |          |
| Wavelength                      | 0.71073 Å                                                                     |          |
| Crystal system                  | Orthorhombic                                                                  |          |
| Space group                     | <i>Pnmm</i>                                                                   |          |
| Unit cell dimensions            | <i>a</i> = 8.414(2) Å                                                         | ∠ = 90°. |
|                                 | <i>b</i> = 10.307(3) Å                                                        | ∠ = 90°. |
|                                 | <i>c</i> = 13.192(3) Å                                                        | ∠ = 90°. |
| Volume                          | 1144.0(5) Å <sup>3</sup>                                                      |          |
| <i>Z</i>                        | 2                                                                             |          |
| Density (calculated)            | 1.632 Mg/m <sup>3</sup>                                                       |          |
| Absorption coefficient          | 1.865 mm <sup>-1</sup>                                                        |          |
| <i>F</i> (000)                  | 562                                                                           |          |
| Crystal size                    | 0.34 × 0.28 × 0.14 mm <sup>3</sup>                                            |          |
| Theta range for data collection | 2.51 to 24.98°.                                                               |          |
| Index ranges                    | 0 ≤ <i>h</i> ≤ 10, 0 ≤ <i>k</i> ≤ 12, -15 ≤ <i>l</i> ≤ 0                      |          |
| Reflections collected           | 977                                                                           |          |
| Independent reflections         | 977 [ <i>R</i> (int) = 0.0000]                                                |          |
| Completeness to theta = 24.98°  | 93.0 %                                                                        |          |
| Absorption correction           | Empirical                                                                     |          |
| Max. and min. transmission      | 0.4967 and 0.1954                                                             |          |
| Refinement method               | Full-matrix least-squares on <i>F</i> <sup>2</sup>                            |          |

|                                        |                                              |
|----------------------------------------|----------------------------------------------|
| Data / restraints / parameters         | 977 / 0 / 76                                 |
| Goodness-of-fit on $F^2$               | 1.124                                        |
| Final $R$ indices [ $I > 2\sigma(I)$ ] | $R1 = 0.0449$ , $wR2 = 0.1197$               |
| $R$ indices (all data)                 | $R1 = 0.0785$ , $wR2 = 0.1624$               |
| Extinction coefficient                 | 0.0007(7)                                    |
| Largest diff. peak and hole            | 0.585 and $-0.724 \text{ e.}\text{\AA}^{-3}$ |

**Table 2. Atomic coordinates ( $\times 10^4$ ) and equivalent isotropic displacement parameters ( $\text{\AA}^2 \times 10^3$ ) for FE.**

U(eq) is defined as one third of the trace of the orthogonalized  $U_{ij}$  tensor.

|       | x        | y         | z       | U(eq)  |
|-------|----------|-----------|---------|--------|
| Sb(1) | 0        | 0         | 5000    | 57(1)  |
| Fe(1) | 5000     | -5000     | 5000    | 36(1)  |
| F(1)  | 2136(9)  | 449(8)    | 5000    | 128(3) |
| F(2)  | 364(7)   | -1251(4)  | 4002(3) | 107(2) |
| C(1)  | 2519(12) | -5071(8)  | 5000    | 63(3)  |
| C(2)  | 3049(8)  | -4372(7)  | 4129(5) | 64(2)  |
| C(3)  | 3927(8)  | -3281(6)  | 4454(5) | 64(2)  |
| C(4)  | 1541(15) | -6287(11) | 5000    | 127(6) |
| C(5)  | 2693(12) | -4717(11) | 3041(6) | 122(4) |
| C(6)  | 4667(12) | -2235(9)  | 3793(8) | 119(4) |

**Table 3. Bond lengths [Å] and angles [°] for FE.**

---

|                     |            |
|---------------------|------------|
| Sb(1)-F(1)#1        | 1.856(8)   |
| Sb(1)-F(1)          | 1.856(8)   |
| Sb(1)-F(2)          | 1.868(4)   |
| Sb(1)-F(2)#2        | 1.868(4)   |
| Sb(1)-F(2)#1        | 1.868(4)   |
| Sb(1)-F(2)#3        | 1.868(4)   |
| Fe(1)-C(1)#4        | 2.089(10)  |
| Fe(1)-C(1)          | 2.089(10)  |
| Fe(1)-C(2)          | 2.106(6)   |
| Fe(1)-C(2)#5        | 2.106(6)   |
| Fe(1)-C(2)#4        | 2.106(6)   |
| Fe(1)-C(2)#2        | 2.106(6)   |
| Fe(1)-C(3)#5        | 2.115(6)   |
| Fe(1)-C(3)#4        | 2.115(6)   |
| Fe(1)-C(3)          | 2.115(6)   |
| Fe(1)-C(3)#2        | 2.115(6)   |
| C(1)-C(2)#2         | 1.428(8)   |
| C(1)-C(2)           | 1.428(8)   |
| C(1)-C(4)           | 1.499(14)  |
| C(2)-C(3)           | 1.412(9)   |
| C(2)-C(5)           | 1.509(9)   |
| C(3)-C(3)#2         | 1.439(13)  |
| C(3)-C(6)           | 1.521(10)  |
| C(4)-H(4A)          | 0.9600     |
| C(4)-H(4B)          | 0.9600     |
| C(4)-H(4C)          | 0.9600     |
| C(5)-H(5A)          | 0.9600     |
| C(5)-H(5B)          | 0.9600     |
| C(5)-H(5C)          | 0.9600     |
| C(6)-H(6A)          | 0.9600     |
| C(6)-H(6B)          | 0.9600     |
| C(6)-H(6C)          | 0.9600     |
|                     |            |
| F(1)#1-Sb(1)-F(1)   | 180.000(1) |
| F(1)#1-Sb(1)-F(2)   | 89.2(3)    |
| F(1)-Sb(1)-F(2)     | 90.8(3)    |
| F(1)#1-Sb(1)-F(2)#2 | 89.2(3)    |
| F(1)-Sb(1)-F(2)#2   | 90.8(3)    |
| F(2)-Sb(1)-F(2)#2   | 89.6(3)    |
| F(1)#1-Sb(1)-F(2)#1 | 90.8(3)    |
| F(1)-Sb(1)-F(2)#1   | 89.2(3)    |
| F(2)-Sb(1)-F(2)#1   | 180.000(1) |
| F(2)#2-Sb(1)-F(2)#1 | 90.4(3)    |
| F(1)#1-Sb(1)-F(2)#3 | 90.8(3)    |
| F(1)-Sb(1)-F(2)#3   | 89.2(3)    |
| F(2)-Sb(1)-F(2)#3   | 90.4(3)    |
| F(2)#2-Sb(1)-F(2)#3 | 180.000(1) |
| F(2)#1-Sb(1)-F(2)#3 | 89.6(3)    |

|                     |            |
|---------------------|------------|
| C(1)#4-Fe(1)-C(1)   | 180.000(1) |
| C(1)#4-Fe(1)-C(2)   | 140.2(2)   |
| C(1)-Fe(1)-C(2)     | 39.8(2)    |
| C(1)#4-Fe(1)-C(2)#5 | 39.8(2)    |
| C(1)-Fe(1)-C(2)#5   | 140.2(2)   |
| C(2)-Fe(1)-C(2)#5   | 113.8(4)   |
| C(1)#4-Fe(1)-C(2)#4 | 39.8(2)    |
| C(1)-Fe(1)-C(2)#4   | 140.2(2)   |
| C(2)-Fe(1)-C(2)#4   | 180.0(3)   |
| C(2)#5-Fe(1)-C(2)#4 | 66.2(4)    |
| C(1)#4-Fe(1)-C(2)#2 | 140.2(2)   |
| C(1)-Fe(1)-C(2)#2   | 39.8(2)    |
| C(2)-Fe(1)-C(2)#2   | 66.2(4)    |
| C(2)#5-Fe(1)-C(2)#2 | 180.0(3)   |
| C(2)#4-Fe(1)-C(2)#2 | 113.8(4)   |
| C(1)#4-Fe(1)-C(3)#5 | 66.6(3)    |
| C(1)-Fe(1)-C(3)#5   | 113.4(3)   |
| C(2)-Fe(1)-C(3)#5   | 113.9(2)   |
| C(2)#5-Fe(1)-C(3)#5 | 39.1(3)    |
| C(2)#4-Fe(1)-C(3)#5 | 66.1(2)    |
| C(2)#2-Fe(1)-C(3)#5 | 140.9(3)   |
| C(1)#4-Fe(1)-C(3)#4 | 66.6(3)    |
| C(1)-Fe(1)-C(3)#4   | 113.4(3)   |
| C(2)-Fe(1)-C(3)#4   | 140.9(3)   |
| C(2)#5-Fe(1)-C(3)#4 | 66.1(2)    |
| C(2)#4-Fe(1)-C(3)#4 | 39.1(3)    |
| C(2)#2-Fe(1)-C(3)#4 | 113.9(2)   |
| C(3)#5-Fe(1)-C(3)#4 | 39.8(4)    |
| C(1)#4-Fe(1)-C(3)   | 113.4(3)   |
| C(1)-Fe(1)-C(3)     | 66.6(3)    |
| C(2)-Fe(1)-C(3)     | 39.1(3)    |
| C(2)#5-Fe(1)-C(3)   | 113.9(2)   |
| C(2)#4-Fe(1)-C(3)   | 140.9(3)   |
| C(2)#2-Fe(1)-C(3)   | 66.1(2)    |
| C(3)#5-Fe(1)-C(3)   | 140.2(4)   |
| C(3)#4-Fe(1)-C(3)   | 180.000(1) |
| C(1)#4-Fe(1)-C(3)#2 | 113.4(3)   |
| C(1)-Fe(1)-C(3)#2   | 66.6(3)    |
| C(2)-Fe(1)-C(3)#2   | 66.1(2)    |
| C(2)#5-Fe(1)-C(3)#2 | 140.9(3)   |
| C(2)#4-Fe(1)-C(3)#2 | 113.9(2)   |
| C(2)#2-Fe(1)-C(3)#2 | 39.1(3)    |
| C(3)#5-Fe(1)-C(3)#2 | 180.000(1) |
| C(3)#4-Fe(1)-C(3)#2 | 140.2(4)   |
| C(3)-Fe(1)-C(3)#2   | 39.8(4)    |
| C(2)#2-C(1)-C(2)    | 107.2(8)   |
| C(2)#2-C(1)-C(4)    | 126.4(4)   |
| C(2)-C(1)-C(4)      | 126.4(4)   |
| C(2)#2-C(1)-Fe(1)   | 70.8(5)    |
| C(2)-C(1)-Fe(1)     | 70.8(5)    |

|                   |           |
|-------------------|-----------|
| C(4)-C(1)-Fe(1)   | 125.3(7)  |
| C(3)-C(2)-C(1)    | 108.7(6)  |
| C(3)-C(2)-C(5)    | 125.5(8)  |
| C(1)-C(2)-C(5)    | 125.8(8)  |
| C(3)-C(2)-Fe(1)   | 70.8(3)   |
| C(1)-C(2)-Fe(1)   | 69.4(5)   |
| C(5)-C(2)-Fe(1)   | 127.0(5)  |
| C(2)-C(3)-C(3)#2  | 107.7(4)  |
| C(2)-C(3)-C(6)    | 127.2(7)  |
| C(3)#2-C(3)-C(6)  | 125.0(5)  |
| C(2)-C(3)-Fe(1)   | 70.1(3)   |
| C(3)#2-C(3)-Fe(1) | 70.10(18) |
| C(6)-C(3)-Fe(1)   | 127.9(5)  |
| C(1)-C(4)-H(4A)   | 109.5     |
| C(1)-C(4)-H(4B)   | 109.5     |
| H(4A)-C(4)-H(4B)  | 109.5     |
| C(1)-C(4)-H(4C)   | 109.5     |
| H(4A)-C(4)-H(4C)  | 109.5     |
| H(4B)-C(4)-H(4C)  | 109.5     |
| C(2)-C(5)-H(5A)   | 109.5     |
| C(2)-C(5)-H(5B)   | 109.5     |
| H(5A)-C(5)-H(5B)  | 109.5     |
| C(2)-C(5)-H(5C)   | 109.5     |
| H(5A)-C(5)-H(5C)  | 109.5     |
| H(5B)-C(5)-H(5C)  | 109.5     |
| C(3)-C(6)-H(6A)   | 109.5     |
| C(3)-C(6)-H(6B)   | 109.5     |
| H(6A)-C(6)-H(6B)  | 109.5     |
| C(3)-C(6)-H(6C)   | 109.5     |
| H(6A)-C(6)-H(6C)  | 109.5     |
| H(6B)-C(6)-H(6C)  | 109.5     |

---

Symmetry transformations used to generate equivalent atoms:

#1 -x,-y,-z+1 #2 x,y,-z+1 #3 -x,-y,z #4 -x+1,-y-1,-z+1

#5 -x+1,-y-1,z

**Table 4. Anisotropic displacement parameters ( $\text{\AA}^2 \times 10^3$ ) for FE.**

The anisotropic displacement factor exponent takes the form:  $-2\pi^2 [h^2 a^{*2} U^{11} + \dots + 2 h k a^* b^* U^{12}]$

|       | U11    | U22     | U33     | U23    | U13    | U12    |
|-------|--------|---------|---------|--------|--------|--------|
| Sb(1) | 71(1)  | 65(1)   | 35(1)   | 0      | 0      | -12(1) |
| Fe(1) | 39(1)  | 49(1)   | 20(1)   | 0      | 0      | 2(1)   |
| F(1)  | 85(5)  | 100(5)  | 199(9)  | 0      | 0      | -22(4) |
| F(2)  | 182(5) | 83(3)   | 56(3)   | -18(2) | 14(3)  | -15(3) |
| C(1)  | 41(5)  | 52(5)   | 96(8)   | 0      | 0      | 9(3)   |
| C(2)  | 71(4)  | 82(4)   | 38(3)   | -6(3)  | -16(3) | 25(4)  |
| C(3)  | 77(4)  | 56(3)   | 59(4)   | 16(3)  | 1(3)   | 10(3)  |
| C(4)  | 66(7)  | 72(7)   | 243(19) | 0      | 0      | -7(6)  |
| C(5)  | 105(8) | 211(12) | 50(5)   | -39(6) | -33(5) | 43(7)  |
| C(6)  | 134(8) | 92(6)   | 130(9)  | 68(6)  | 25(7)  | 17(5)  |

**Table 5. Hydrogen coordinates ( $\times 10^4$ ) and isotropic displacement parameters ( $\text{\AA}^2 \times 10^3$ ) for FE.**

|       | x    | y     | z    | U(eq) |
|-------|------|-------|------|-------|
| H(4A) | 1499 | -6636 | 4326 | 191   |
| H(4B) | 484  | -6092 | 5227 | 191   |
| H(4C) | 2015 | -6912 | 5447 | 191   |
| H(5A) | 2555 | -5639 | 2982 | 183   |
| H(5B) | 3559 | -4445 | 2618 | 183   |
| H(5C) | 1736 | -4287 | 2830 | 183   |
| H(6A) | 3954 | -1512 | 3743 | 178   |
| H(6B) | 4865 | -2579 | 3128 | 178   |
| H(6C) | 5651 | -1955 | 4089 | 178   |
